# Supplementary material for: An expedited screening platform for the discovery of anti-ageing compounds in vitro and in vivo
Source: PubMed Central journal article supplement (PMC11218148; doi:10.1186/s13073-024-01349-w), 2024-07-02
Supplement: 13073_2024_1349_MOESM1_ESM.pdf [file 13073_2024_1349_MOESM1_ESM.pdf]

# 1 SUPPLEMENTARY FIGURES

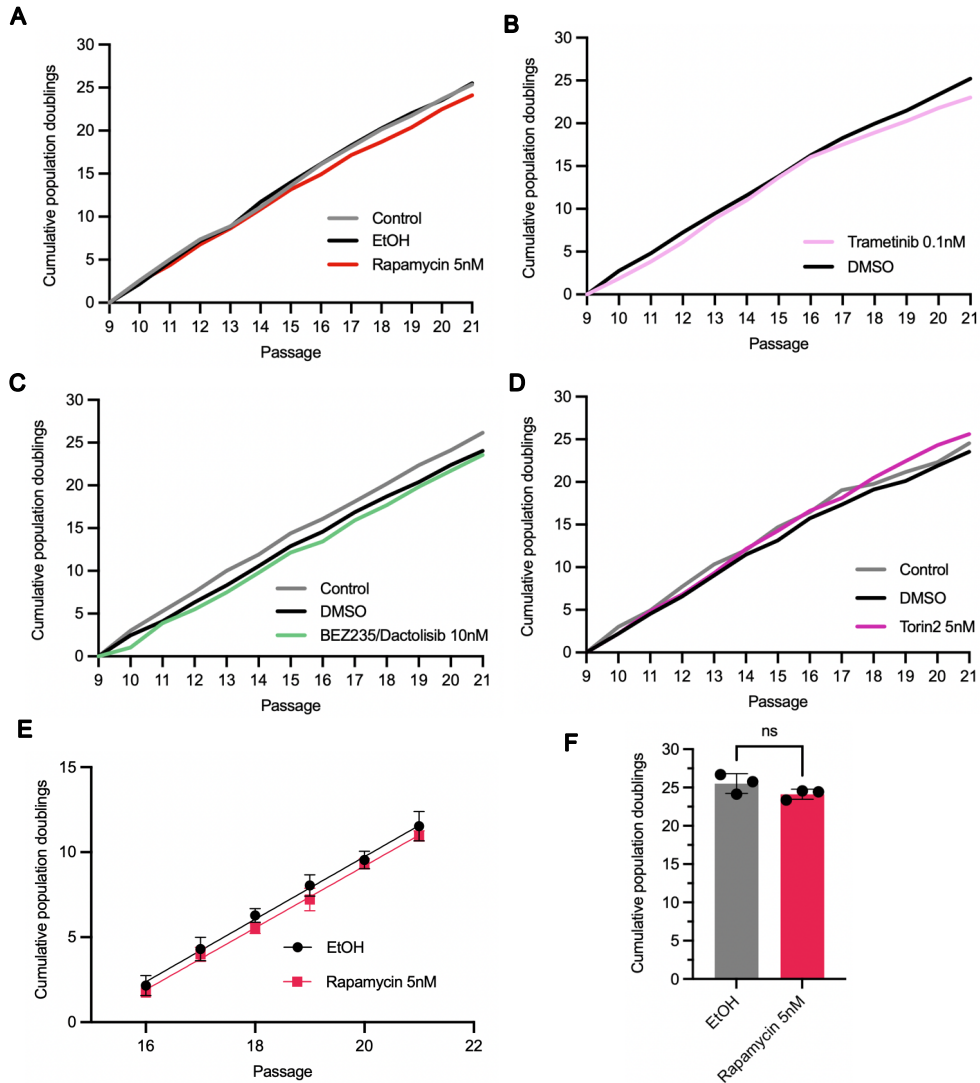

**G**

| Passage number | Cumulative population doublings |       |       |            |            |            |          |          |          |
|----------------|---------------------------------|-------|-------|------------|------------|------------|----------|----------|----------|
|                | EtOH1                           | EtOH2 | EtOH3 | Rapamycin1 | Rapamycin2 | Rapamycin3 | Control1 | Control2 | Control3 |
| 10             | 1.60                            | 2.94  | 2.01  | 2.15       | 2.29       | 2.89       | 2.44     | 2.47     | 2.86     |
| 11             | 3.86                            | 5.48  | 4.85  | 3.86       | 4.54       | 4.65       | 4.74     | 5.03     | 5.33     |
| 12             | 6.63                            | 7.56  | 7.28  | 6.35       | 6.97       | 6.93       | 7.22     | 7.22     | 7.66     |
| 13             | 7.64                            | 9.94  | 8.94  | 7.87       | 9.40       | 8.65       | 8.97     | 8.87     | 8.85     |
| 14             | 10.72                           | 13.07 | 11.35 | 9.90       | 11.49      | 11.21      | 10.76    | 10.96    | 11.63    |
| 15             | 13.49                           | 15.08 | 13.39 | 12.12      | 13.56      | 13.83      | 13.44    | 13.35    | 14.02    |
| 16             | 14.96                           | 17.50 | 15.96 | 14.03      | 15.31      | 15.40      | 15.91    | 15.70    | 16.65    |
| 17             | 17.12                           | 19.35 | 18.40 | 16.13      | 17.13      | 18.23      | 18.16    | 17.53    | 18.66    |
| 18             | 19.44                           | 21.23 | 20.12 | 17.88      | 19.18      | 19.01      | 19.83    | 19.71    | 20.87    |
| 19             | 21.00                           | 22.96 | 22.13 | 19.75      | 21.15      | 20.28      | 21.73    | 21.31    | 22.28    |
| 20             | 22.44                           | 24.91 | 23.23 | 21.62      | 23.04      | 22.79      | 23.40    | 23.07    | 24.48    |
| 21             | 24.13                           | 26.68 | 25.76 | 23.35      | 24.57      | 24.45      | 25.36    | 24.45    | 26.25    |

3

4 **Fig. S1** Drug treatment of HMF did not affect cell growth as measured by population doubling.

5 Represented are population doubling measurements from passage 9 to passage 21 for A) Rapamycin

6 (5nM), B) Trametinib (0.1nM), C) Dactolisib/BEZ235 (10nM), D) Torin2 (5nM) and corresponding

7 vehicle controls. E) Cumulative population doublings for Rapamycin 5nM and EtOH vehicle control

8 samples during the EPIC sample window (Passage 16 to Passage 20 and for a further passage to

9 Passage 21;  $P=0.8394$ ; simple linear regression). F) Comparison of cumulative population doublings

10 from passage 10 to 21 for Rapamycin 5nM and EtOH vehicle control samples ( $p=0.17$ ; t-test). G)

11 Cumulative population doubling values for Rapamycin 5nM, EtOH vehicle control, and non-treated

12 control samples.

13

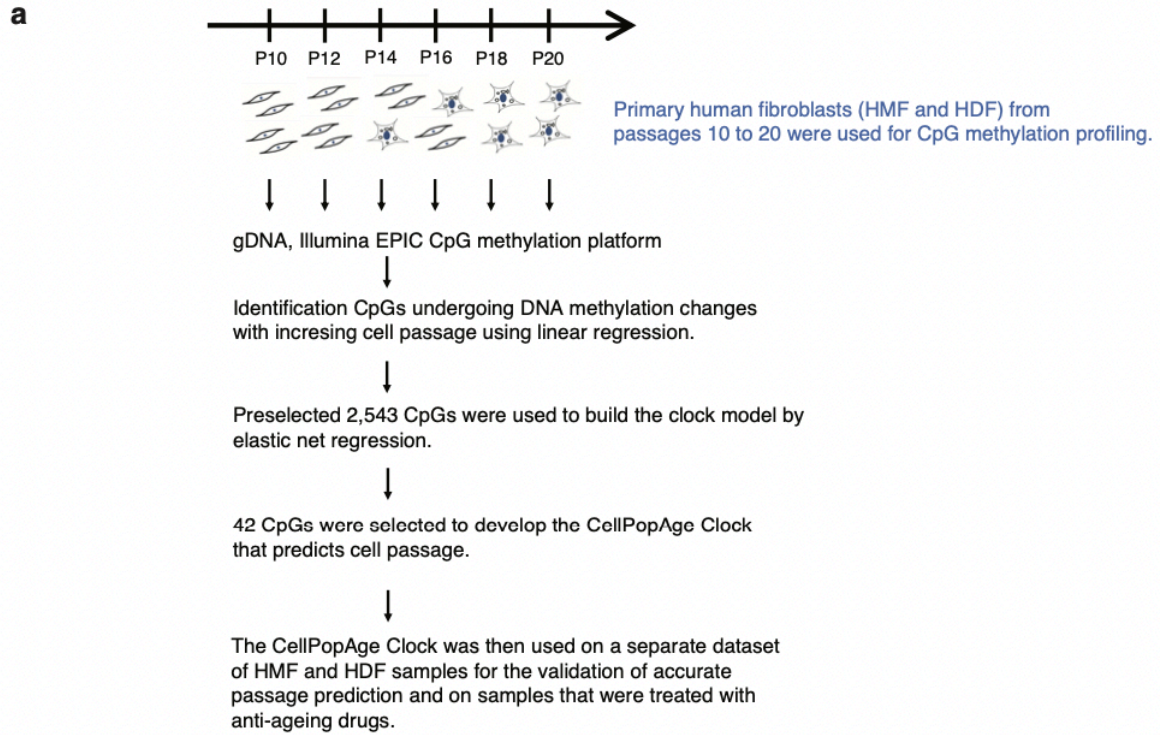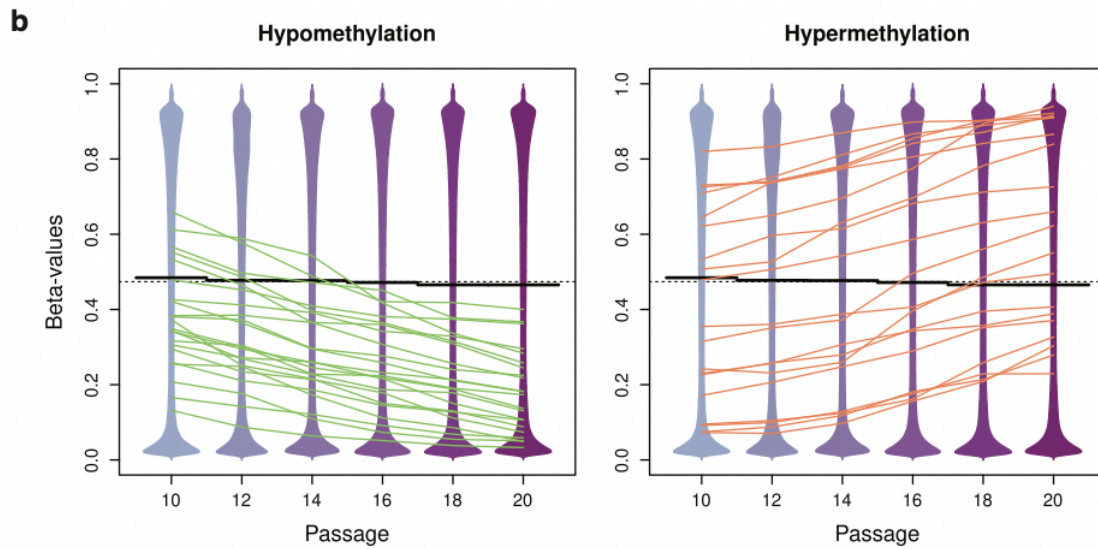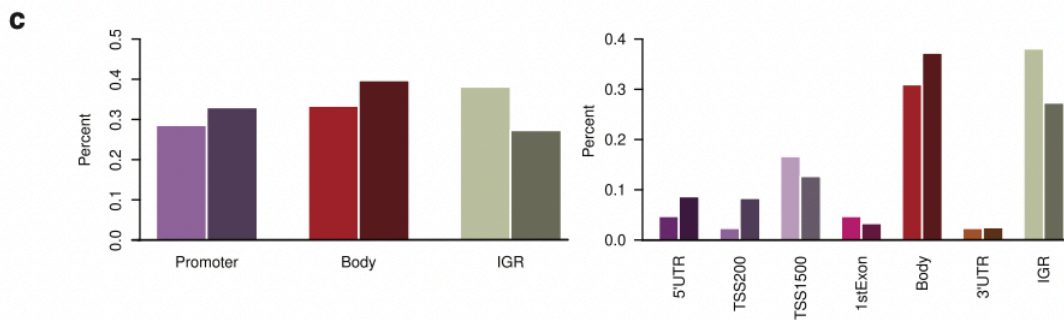

14  
15  
16  
17

18 **Fig. S2** Developing the CellPopAge Clock.

19 A) Scheme for developing of the CellPopAge Clock. A) Primary human mammary fibroblasts and  
20 dermal fibroblasts, from passages 10 to 20, were used for CpG methylation profiling and using  
21 elastic net regression 42 CpGs were selected to develop the CellPopAge Clock that predicts cell  
22 passage.

23 B) The beanplots showing the overall distribution of DNA methylation values (all CpGs, n=736,001)  
24 are presented. Overall DNA methylation levels decrease with increasing cell passage. The lines  
25 show where the clock CpGs sit in the distributions (mean per passage group), and are connected  
26 across passages to see how their methylation levels change. The plots show the mean  
27 methylation changes the clock CpGs are undergoing with increasing passage, separated by  
28 those that become hypo- and hypermethylated, in the context of the global DNA methylation  
29 patterns of all CpGs.

30 C) Barplots showing the percentage of CpGs falling into the corresponding genomic feature. Lighter  
31 bars show the percentages of clock CpGs (x% of the 42 CpGs). Darker bars show the background  
32 distribution (all other CpGs analyzed = 735,959 CpGs). Clock CpGs fall more often into IGRs.  
33 Barplots on the left are separated into gene promoters, gene bodies and IGRs for which in the  
34 CellPopAge Clock CpGs we found 12, 14 and 16, respectively. More detailed separation of the  
35 CellPopAge Clock CpGs into 5'UTR (2 CpGs), TSS200 (1 CpG), TSS1500 (7 CpGs), 1<sup>st</sup> exon (2  
36 CpGs), gene body (13 CpGs) and 3'UTR (1CpG) and IGR (16 CpG).

37

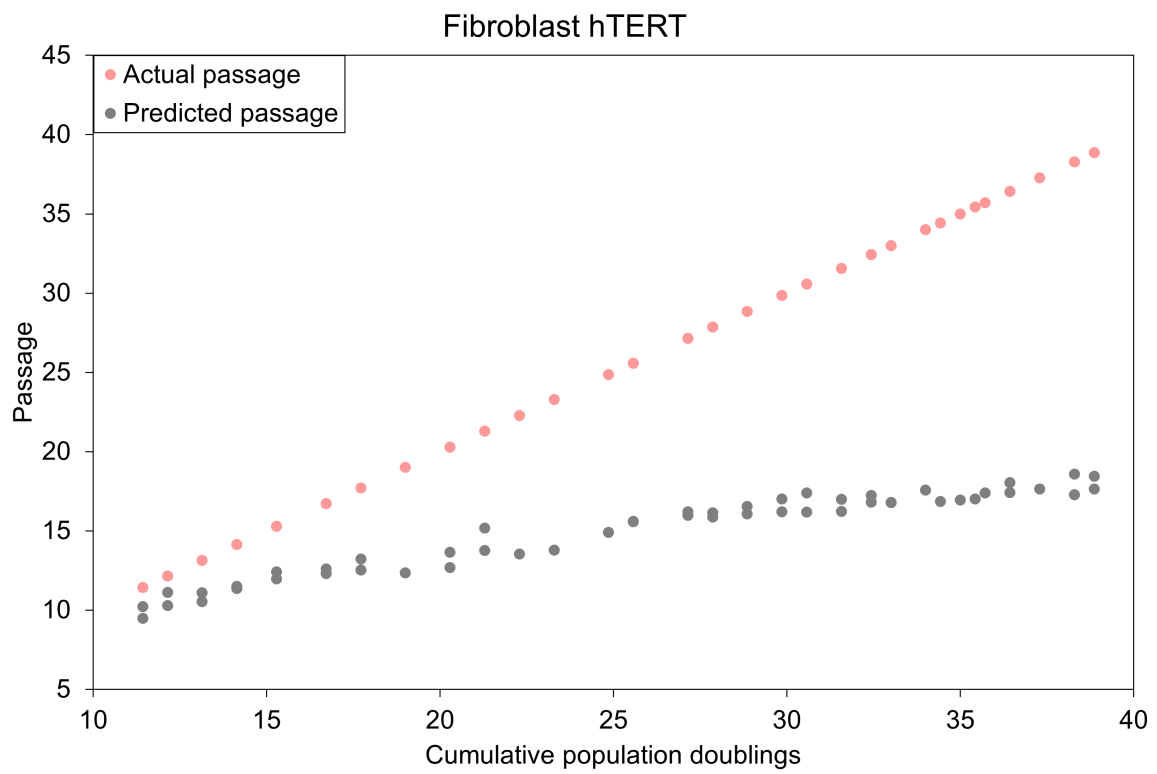

39

40

41 **Fig. S3 A)** The CellPopAge Clock predictions of Human Dermal Fibroblasts (HDF) immortalized

42 with hTERT. Values and experimental details represented in Table S4.

43

44

45  
46  
47  
48  
49  
50  
51  
52  
53  
54  
55  
56  
57  
58  
59  
60  
61  
62  
63  
64  
65  
66  
67  
68

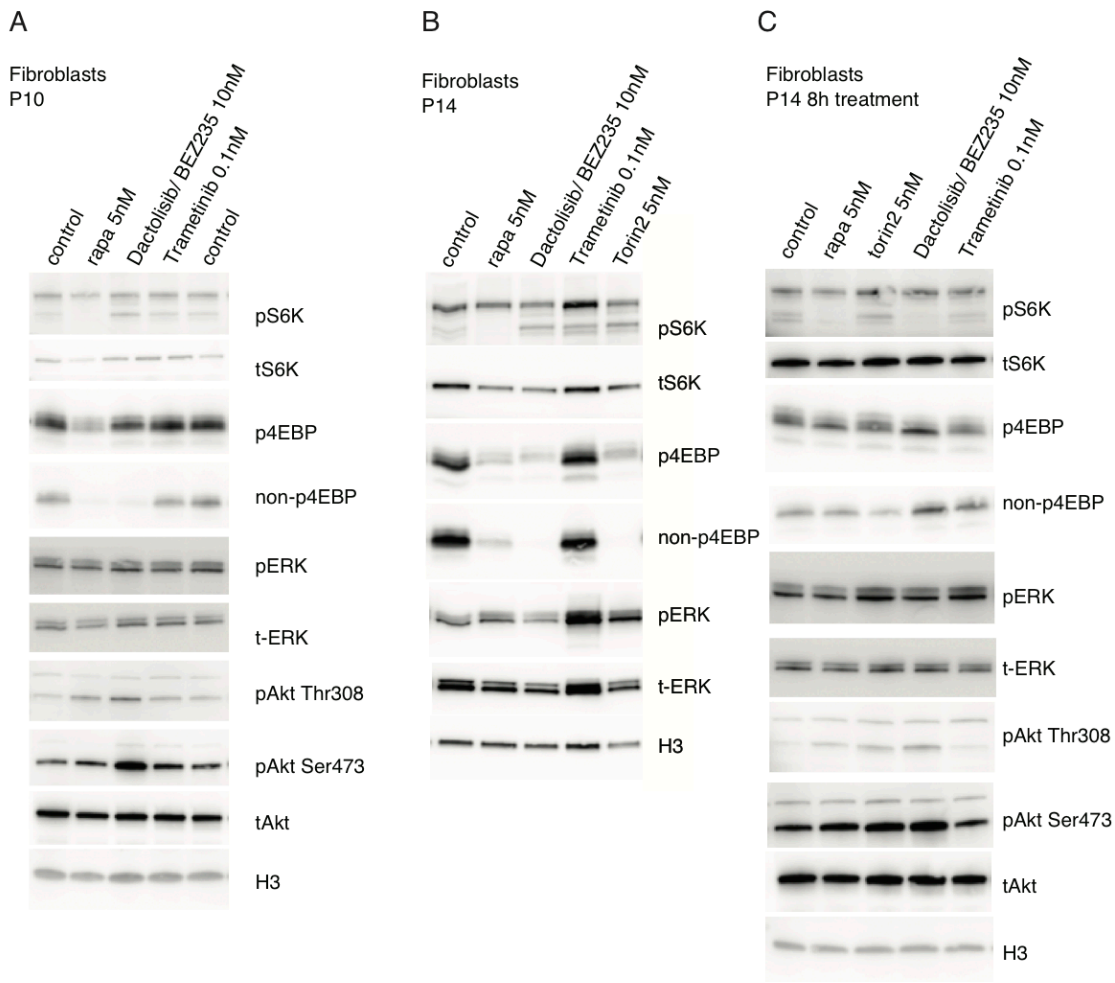

**Fig. S4** Western blot analysis on HMFs treated with anti-ageing drugs. Western blots were probed for phospho-S6K (Thr 389) showing p85 S6K Thr412 and lower band p70 S6K Thr389, total S6K, phospho-4EBP (Thr37/46), non-phospho-4EBP, pERK (Thr202/Tyr204), total ERK, and H3 as a loading control. Western blots analysis of A) HMF passage 10 and B) HMF passage 14 C) HMF passage 14 only 8h treatment with anti-ageing drugs. The analysis reflects rapid (S6K) and slower (4EBP) decreases in phosphorylation, increased phosphorylation (Akt Ser 473 and Akt Thr308) owing to S6K-IRS negative feedback loop, and resilience to phosphorylation changes owing to pMEK rebound and pERK feedback reactivation.

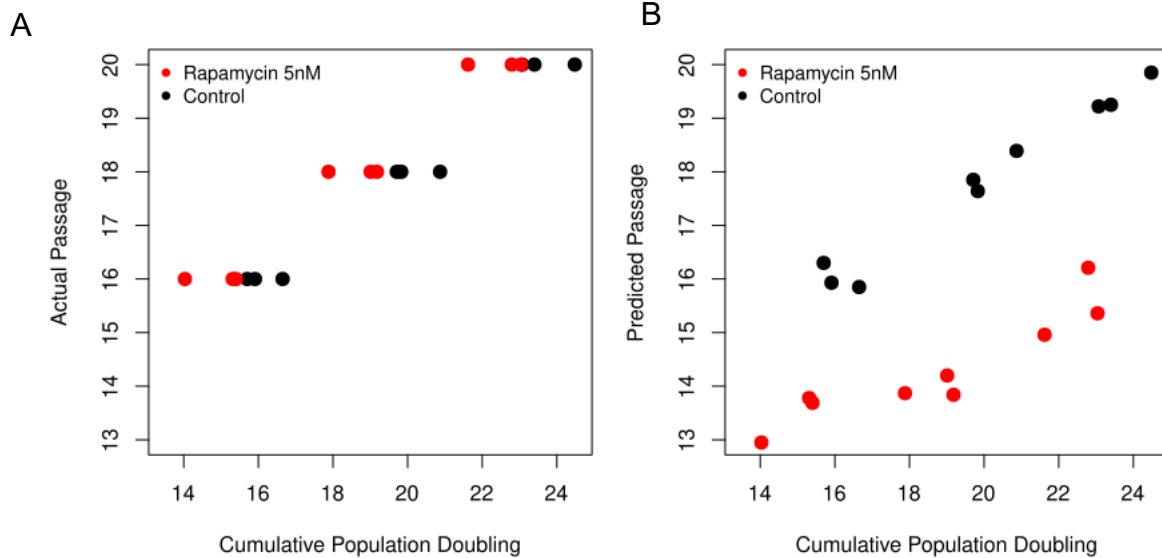

69

70 **Fig. S5** Comparison of cumulative population doublings following treatment with 5nM Rapamycin and  
 71 control cells that were treated with ethanol as a vehicle control.

72 A) A scatterplot of the cumulative population doubling against the actual passage for control and  
 73 Rapamycin samples.

74 B) A scatterplot of the cumulative population doubling against the predicted passage from CellPopAge  
 75 Clock for control and Rapamycin samples.

76

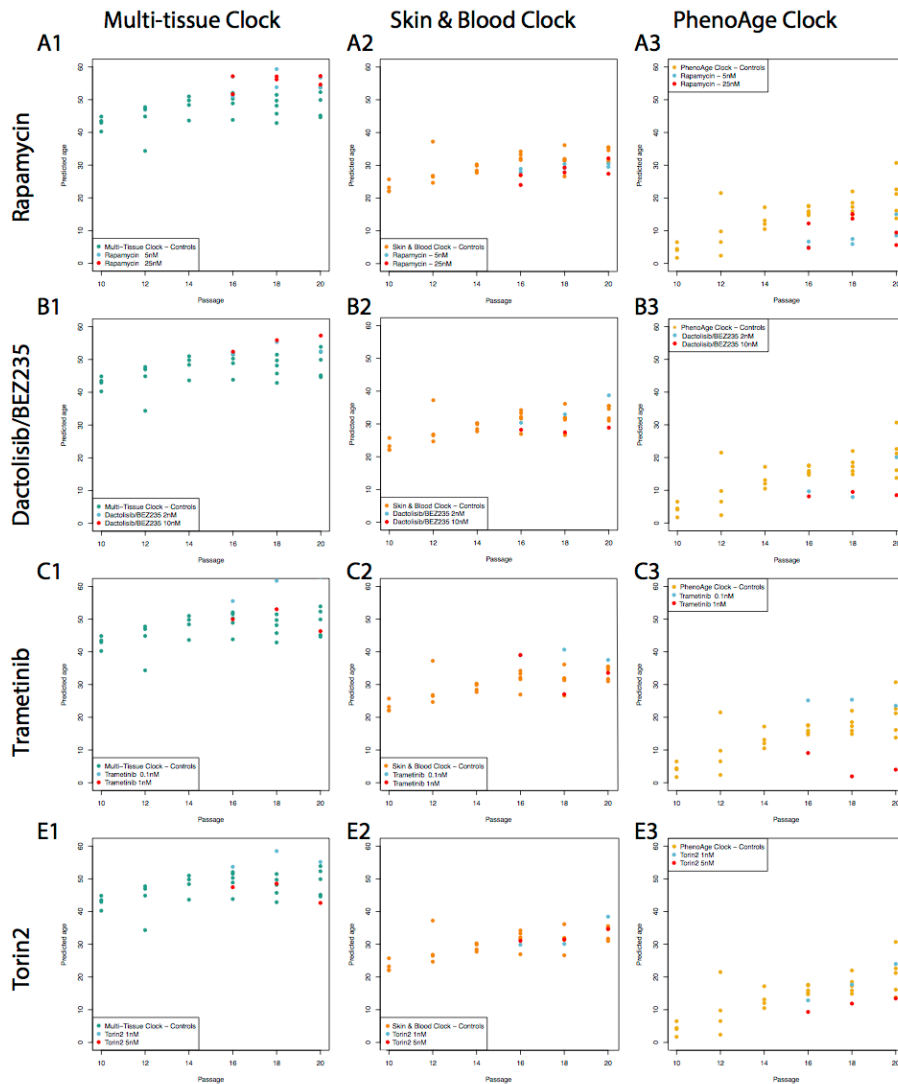

77

78 **Fig. S6** Predicted age of control samples and samples treated with potential anti-ageing drugs using  
 79 three existing epigenetic clocks.

80 Predictions of epigenetic age made using the Multi-Tissue (A1-D1, green), Skin & Blood (A2-D2,  
 81 orange) and PhenoAge (A3-D3, yellow) clocks. Age predictions are indicated for samples treated with  
 82 Rapamycin (A1-A3), Dactolisib/BEZ235 (B1-B3), Trametinib (C1-C3), Torin2 (D1-D3), as compared  
 83 with the set of control samples. These comparisons show that the existing clocks do not consistently  
 84 indicate the anti-ageing effects of these treatments on cultured cells.

85

86
