# Supplementary material for: An expedited screening platform for the discovery of anti-ageing compounds in vitro and in vivo
Source: PubMed Central journal article supplement (PMC11218148; doi:10.1186/s13073-024-01349-w), 2024-07-02
Supplement: 13073_2024_1349_MOESM3_ESM.pdf [file 13073_2024_1349_MOESM3_ESM.pdf]

**Supplemental Table 2:** Spearman's rank correlation and RMSE of the different clocks' predictions with actual cell passage of 26 samples that were not used to build the clock.

| Clock                | Spearman's Rho | p-value   | RMSE  |
|----------------------|----------------|-----------|-------|
| Multi-tissue Clock   | 0.41           | 0.03837   | 33.21 |
| PhenoAge Clock       | 0.62           | 0.00070   | 14.01 |
| Skin and Blood Clock | 0.81           | 4.8e-07   | 11.89 |
| CellPopAge Clock     | 0.98           | < 2.2e-16 | 0.79  |
